# Supplementary material
Source: PubMed Central journal article supplement (PMC5423168)

**A**

CAMA1 Cells

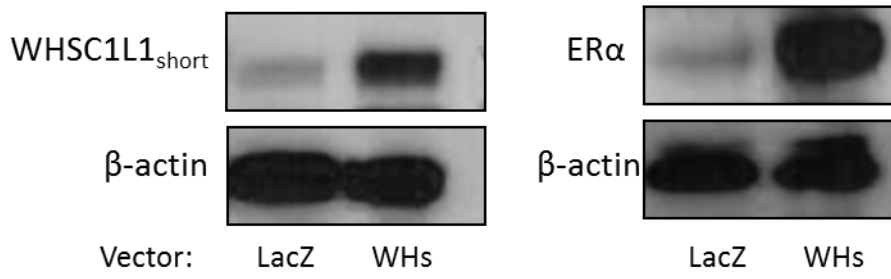**B**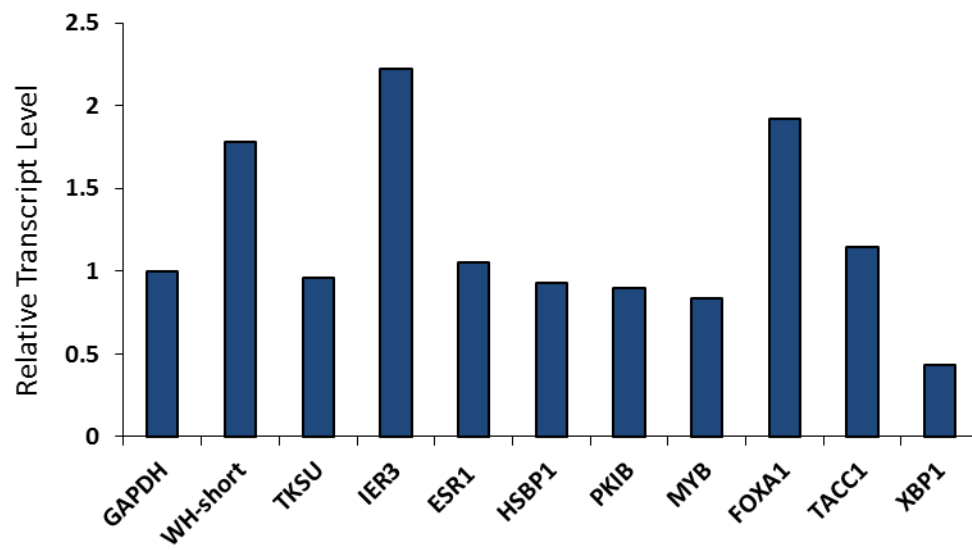

Supplement: MOL2-10-850-s005.pdf [file MOL2-10-850-s005.pdf]

**A**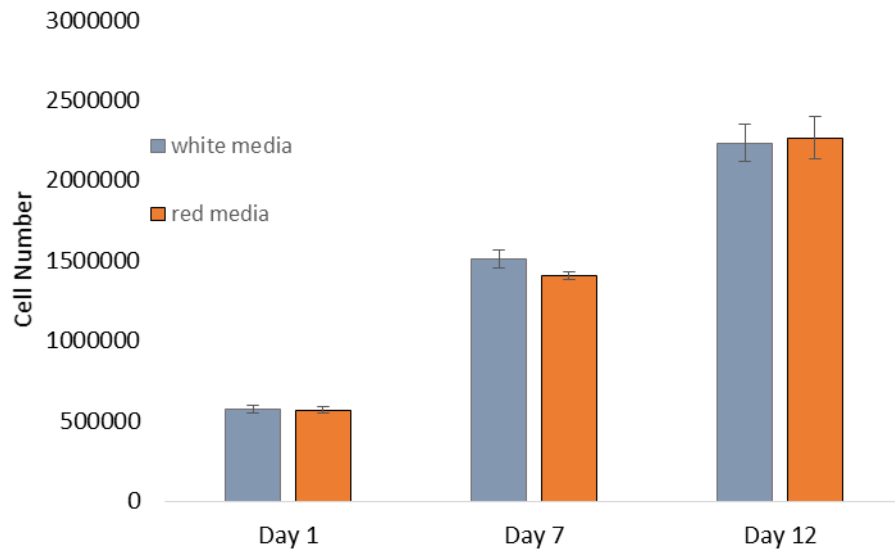**B**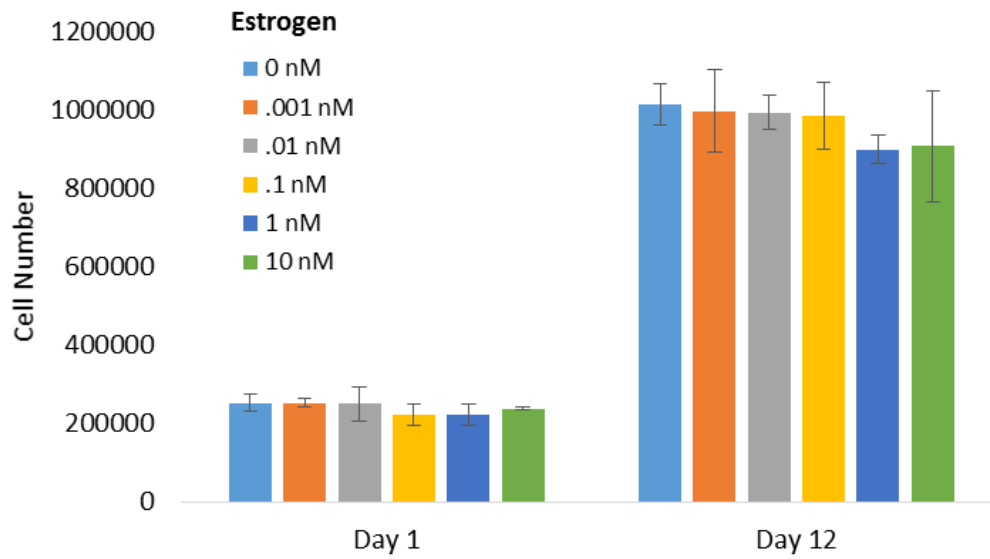

Supplement: MOL2-10-850-s006.pdf [file MOL2-10-850-s006.pdf]
